# Supplementary material for: Graphene oxide–metal oxide nanocomposites: fabrication, characterization and removal of cationic rhodamine B dye
Source: Royal Society of Chemistry journal article supplement (doi:10.1039/c8ra00977e), 2018-01-01
Supplement: c8ra00977e1.pdf [file c8ra00977e1.pdf]

*Supporting Information`s for RSC Advances*

## **Graphene Oxide – Metal Oxide Nanocomposites: Fabrication, Characterization and Removal of Cationic Rhodamine-B Dye**

Nagi M. El-Shafai,<sup>ab</sup> Mohamed E. El-Khouly,<sup>\*c</sup> Maged El-Kemary,<sup>\*bc</sup>  
Mohamed S. Ramadan,<sup>a</sup> Mamdouh S. Masoud<sup>\*a</sup>

*<sup>a</sup> Department of Chemistry, Faculty of Science, Alexandria University, Alexandria, Egypt*

*<sup>b</sup> Institute of Nanoscience and Nanotechnology, Kafrelsheikh University, Kafr El-Sheikh 33516, Egypt*

*<sup>c</sup> Department of Chemistry, Faculty of Science, Kafrelsheikh University, Kafr El-Sheikh 33516, Egypt*

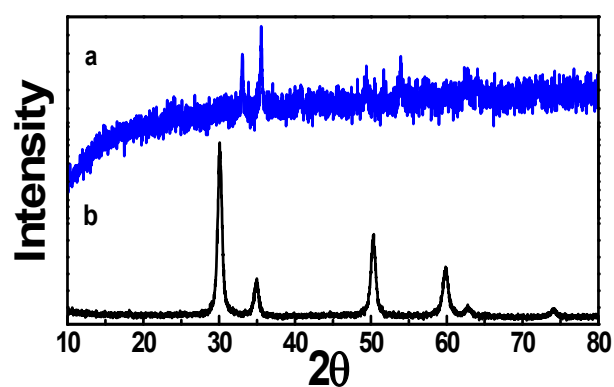

Fig. S1 XRD patterns of: (a)  $\text{Fe}_3\text{O}_4$  NPs (b)  $\text{ZrO}_2$  NP

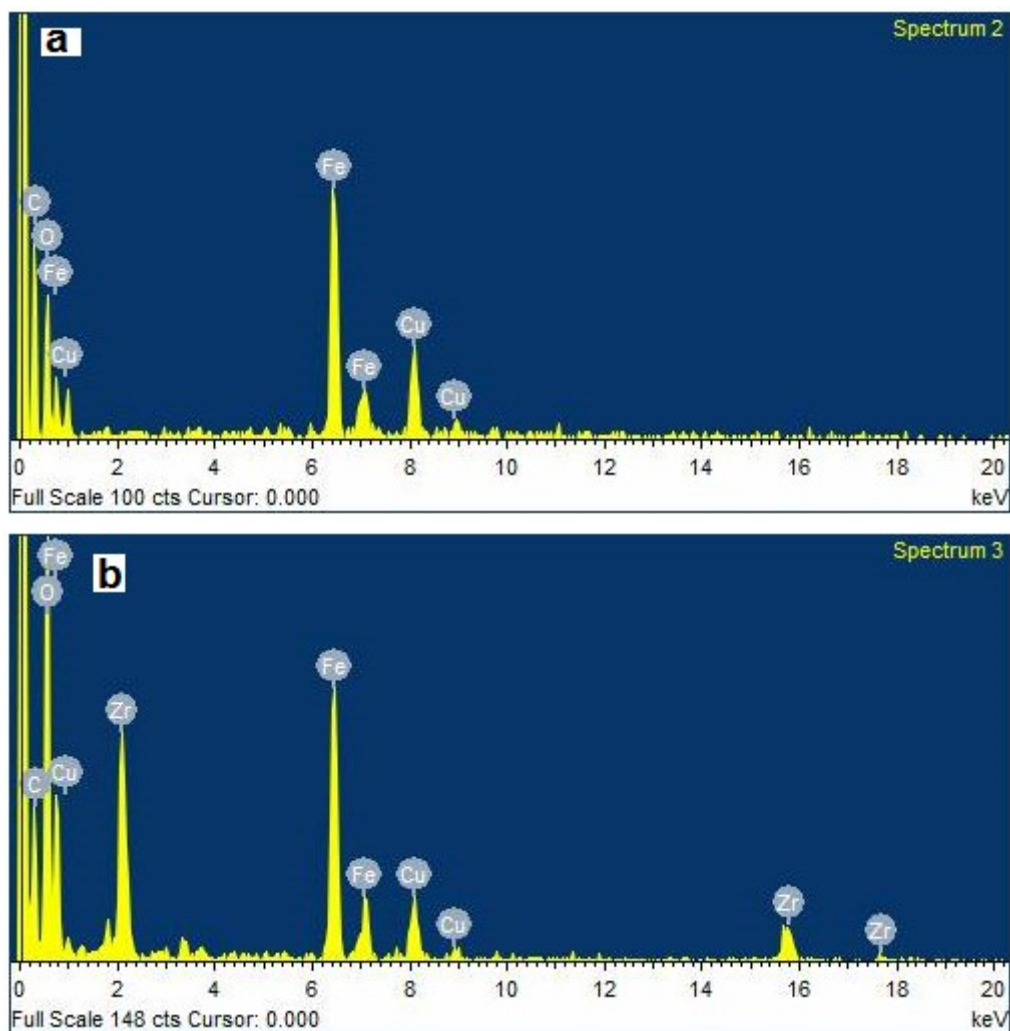

Fig. S2 EDX analysis of: (a)  $\text{GO-Fe}_3\text{O}_4$ , and (b)  $\text{GO-Fe}_3\text{O}_4@Zr\text{O}_2$ .

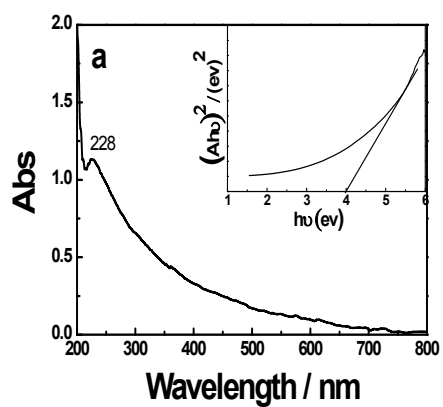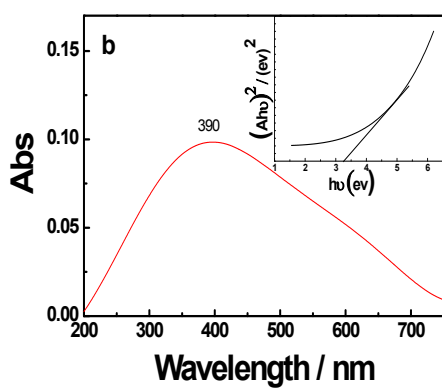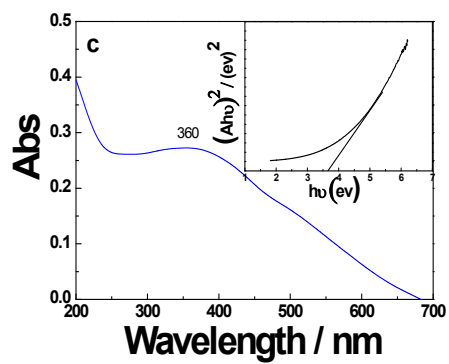

**Fig. S3** UV-visible absorbance spectra of: (a) GO, (b) GO-Fe<sub>3</sub>O<sub>4</sub>@ZrO<sub>2</sub>, and (c) and GO-Fe<sub>3</sub>O<sub>4</sub> in water.

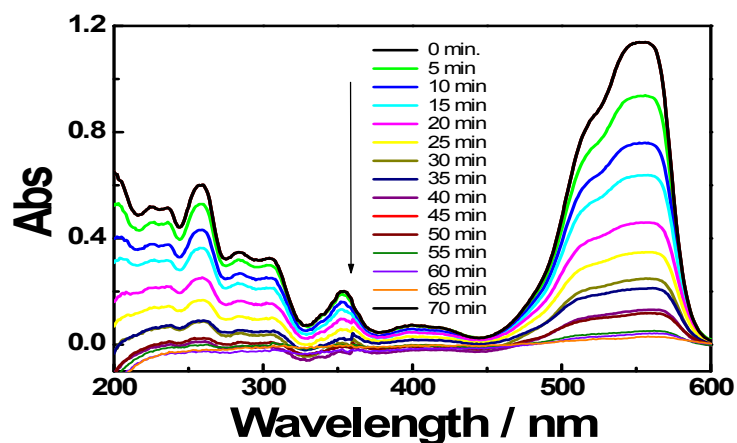

**Fig. S4** UV-absorbance spectra of RhB in the presence of GO-Fe<sub>3</sub>O<sub>4</sub> in water at the indicated time intervals under UV irradiation at 256 nm.

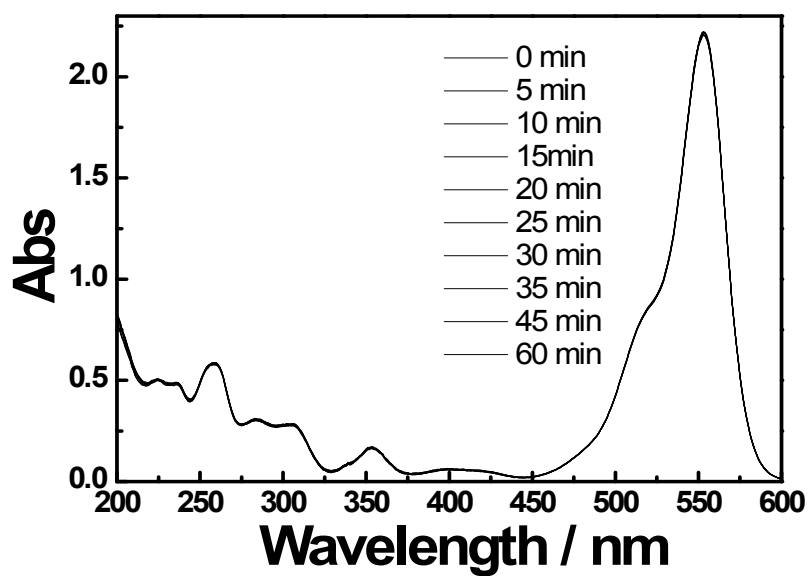

**Fig. S5.** UV absorbance spectrum of RhB in water with different time under radiation.

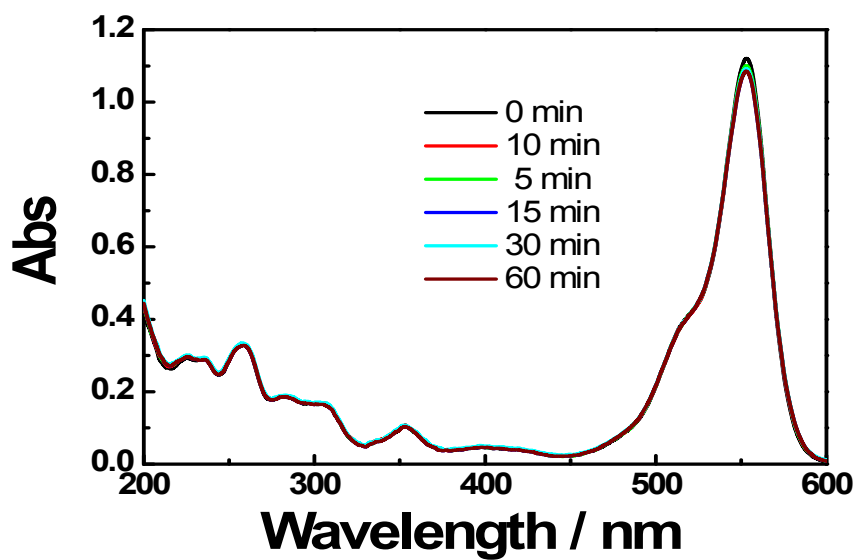

**Fig. S6.** UV- absorbance spectra of RhB in the presence of GO-Fe<sub>3</sub>O<sub>4</sub> in water with different time under simulator of sun light.

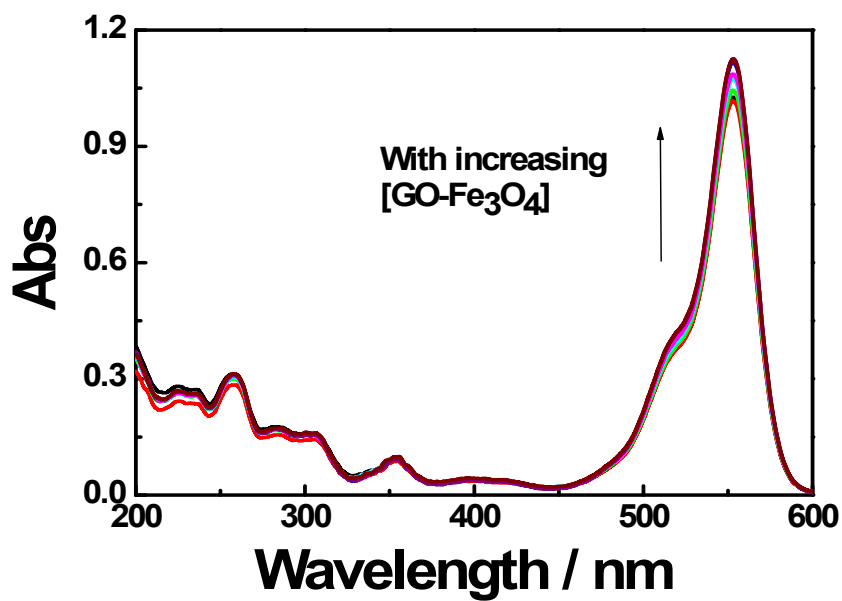

**Fig. S7.** UV-visible absorption spectra of RhB ( $1.7 \times 10^{-5}$  M) with different concentrations of GO-Fe<sub>3</sub>O<sub>4</sub> in water.

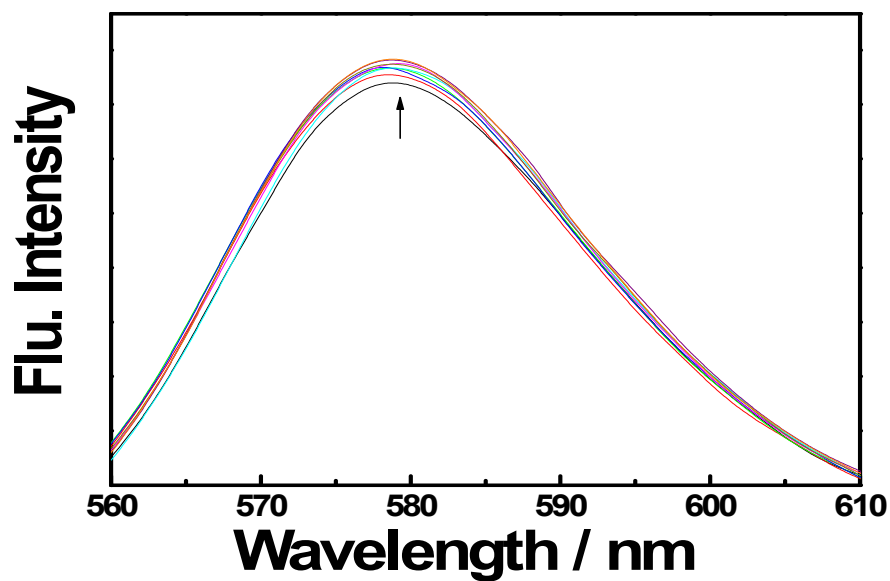

**Fig. S8.** Fluorescence spectra of RhB ( $1.7 \times 10^{-5}$  M) with different concentrations of GO-Fe<sub>3</sub>O<sub>4</sub> without radiation in water.

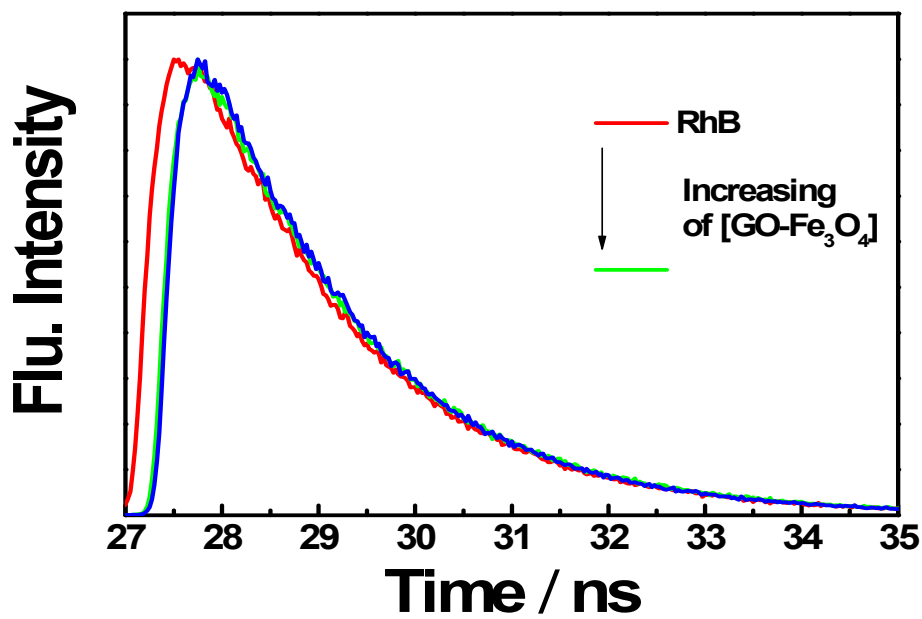

**Fig. S9.** Fluorescence decay profiles of the singlet-excited state of RhB in the presence of GO-Fe<sub>3</sub>O<sub>4</sub> in water;  $\lambda_{\text{ex}} = 420$  nm;  $\lambda_{\text{em}} = 580$  nm.

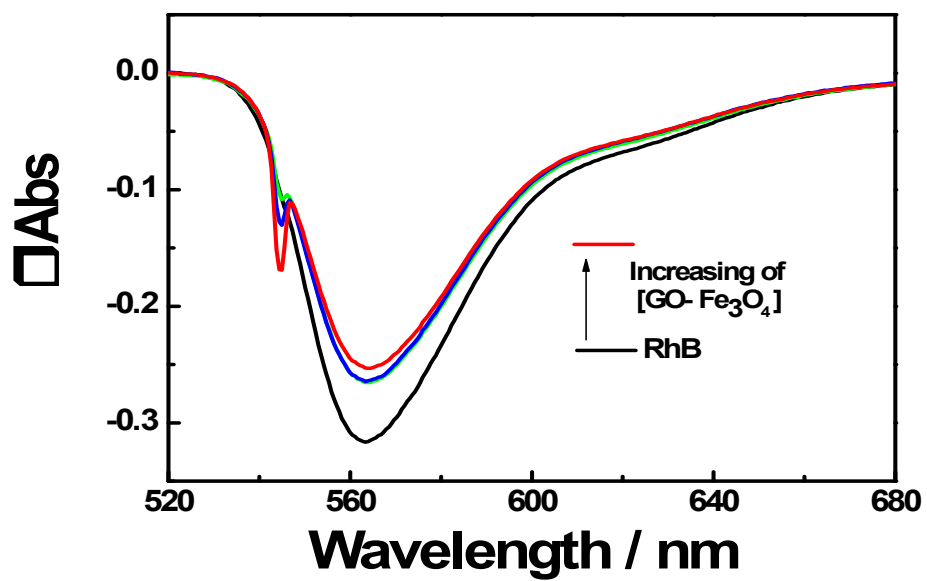

**Fig. S10** Nanosecond transient absorption spectra of RhB in the presence of GO-Fe<sub>3</sub>O<sub>4</sub> in oxygen-free water solutions;  $\lambda_{\text{ex}} = 550$  nm.
